# Supplementary material for: Synthetic DNA Delivery of an Engineered Arginase Enzyme Can Modulate Specific Immunity In Vivo
Source: PubMed Central journal article supplement (PMC7406982; doi:10.1016/j.omtm.2020.05.025), 2020-06-01
Supplement: mmc1.pdf [file mmc1.pdf]

OMTM, Volume 18

## Supplemental Information

**Synthetic DNA Delivery of an Engineered**

**Arginase Enzyme Can Modulate**

**Specific Immunity *In Vivo***

**Makan Khoshnejad, Alfredo Perales-Puchalt, Yaya Dia, Peng Xiao, Ami Patel, Ziyang Xu, Xizhou Zhu, Kun Yun, Ishana Baboo, Rehman Qureshi, Laurent Humeau, Kar Muthumani, and David B. Weiner**

**Supplementary Figures:**

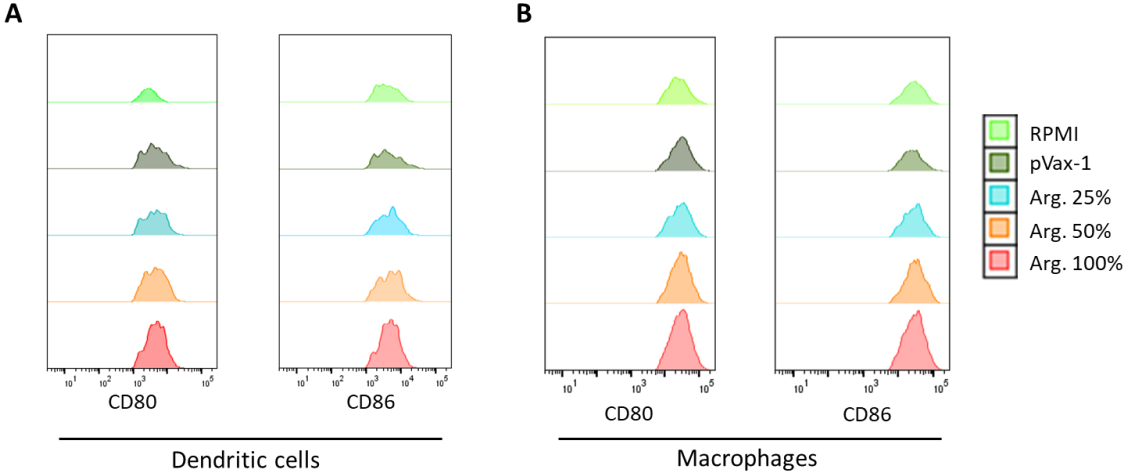

**Supplementary Figure 1. Flow cytometry analysis of costimulatory molecules on bone-marrow derived dendritic cells and macrophages.** Overlay histograms of costimulatory molecule expression in bone-marrow derived (A) dendritic cells and (B) macrophages.
